# Supplementary material
Source: Royal Society of Chemistry journal article supplement (doi:10.1039/d6an00100a)
Supplement: d6an00100a1.xlsx [file d6an00100a1.xlsx]

## Sheet: Table S1 dignostic ions
Table S1. List of common diagnostic ions in negative ion mode used for ganglioside species identification
Chain	[Cer]-	[Hex+Cer]-	[Hex+Hex+Cer]-	[HexNAc+Hex+Hex+Cer]-	[Hex+HexNAc+Hex+Hex+Cer]-
34:1;O2	536.469	698.469	860.469	1063.47	1225.47
35:1;O2	550.484	712.484	874.484	1077.48	1239.48
36:1;O2	564.5	726.5	888.5	1091.5	1253.5
37:1;O2	578.516	740.516	902.516	1105.52	1267.52
38:1;O2	592.531	754.531	916.531	1119.53	1281.53
39:1;O2	606.547	768.547	930.547	1133.55	1295.55
40:1;O2	620.563	782.563	944.563	1147.56	1309.56
41:1;O2	634.578	796.578	958.578	1161.58	1323.58
36:2;O2	562.484	724.484	886.484	1089.48	1251.48
37:2;O2	576.5	738.5	900.5	1103.5	1265.5
38:2;O2	590.516	752.516	914.516	1117.52	1279.52
42:2;O2	646.578	808.578	970.578	1173.58	1335.58
43:2;O2	660.594	822.594	984.594	1187.59	1349.59
44:2;O2	674.61	836.61	998.61	1201.61	1363.61

## Sheet: Table S2 species
Table S1. List of 239 ganglioside species identified in porcine brain
Number of Subclasses	Subclasses	R.T. (min)	Number of Species	Species	Molecular Ion	Theoretical Mass (m/z)	Measured Mass (m/z)	Mass Accuracy (ppm)	1/K0 (V·S/cm2)	Int.	%Rel Abundances
1	GM3	4.5	1	GM3 34:1;O2	[M-H]-	1151.71	1151.71	5.38332	1.621	18906	0.00737477
			2	GM3 35:1;O2	[M-H]-	1165.72	1165.71	-6.56246	1.637	2371	0.000924869
			3	GM3 36:1;O2	[M-H]-	1179.74	1179.74	3.13629	1.654	206920	0.0807144
			4	GM3 37:1;O2	[M-H]-	1193.75	1193.76	3.39266	1.668	5770	0.00225073
			5	GM3 38:1;O2	[M-H]-	1207.77	1207.77	4.22266	1.678	81062	0.0316203
			6	GM3 39:1;O2	[M-H]-	1221.78	1221.79	1.59603	1.701	3089	0.00120494
			7	GM3 40:1;O2	[M-H]-	1235.8	1235.8	-1.86114	1.713	11889	0.00463761
			8	GM3 41:1;O2	[M-H]-	1249.82	1249.83	9.4814	1.722	2885	0.00112537
			9	GM3 42:1;O2	[M-H]-	1263.83	1263.84	5.69696	1.737	9920.83	0.00386987
			10	GM3 36:2;O2	[M-H]-	1177.72	1177.72	-1.63027	1.647	21932	0.00855513
			11	GM3 38:2;O2	[M-H]-	1205.75	1205.75	-0.290275	1.675	8789	0.00342837
			12	GM3 40:2;O2	[M-H]-	1233.78	1233.79	2.95838	1.705	1388	0.000541425
			13	GM3 42:2;O2	[M-H]-	1261.82	1261.82	3.36816	1.726	9492	0.0037026
2	GM2	5.5	14	GM2 34:1;O2	[M-H]-	1354.79	1354.79	4.35493	1.772	3498	0.00136448
			15	GM2 36:1;O2	[M-H]-	1382.82	1382.82	4.83072	1.798	58671	0.0228861
			16	GM2 37:1;O2	[M-H]-	1396.83	1396.83	1.03806	1.809	1143	0.000445856
			17	GM2 38:1;O2	[M-H]-	1410.85	1410.85	4.25276	1.821	29282	0.0114222
			18	GM2 36:2;O2	[M-H]-	1380.8	1380.81	4.49015	1.794	7110	0.00277344
			19	GM2 38:2;O2	[M-H]-	1408.83	1408.84	8.80162	1.818	3294	0.00128491
3	O-Ac-GM1a	6.2	20	O-Ac-GM1a 36:1;O2	[M-H]-	1586.88	1586.9	9.95664	1.932	4507	0.00175807
			21	O-Ac-GM1a 38:1;O2	[M-H]-	1614.91	1614.92	5.51114	1.949	2739	0.00106842
4	GM1a	7	6	GM1a 32:1;O2	[M-H]-	1488.81	1488.8	-5.6421	1.867	2285	0.000891322
			23	GM1a 34:1;O2	[M-H]-	1516.84	1516.85	6.32895	1.881	25646	0.0100039
			24	GM1a 35:1;O2	[M-H]-	1530.85	1530.86	1.11049	1.888	10449	0.0040759
			25	GM1a 36:1;O2	[M-H]-	1544.87	1544.88	6.34358	1.902	831549	0.324367
			26	GM1a 37:1;O2	[M-H]-	1558.89	1558.89	4.61869	1.912	3759	0.00146629
			27	GM1a 38:1;O2	[M-H]-	1572.9	1572.91	6.35768	1.925	510895	0.199288
			28	GM1a 39:1;O2	[M-H]-	1586.92	1586.93	7.24676	1.924	13849	0.00540215
			29	GM1a 40:1;O2	[M-H]-	1600.93	1600.94	5.87158	1.932	50301	0.0196212
			30	GM1a 41:1;O2	[M-H]-	1614.95	1614.95	2.6007	1.934	16875	0.00658252
			31	GM1a 34:2;O2	[M-H]-	1514.82	1514.83	2.70659	1.882	1080	0.000421281
			32	GM1a 36:2;O2	[M-H]-	1542.85	1542.85	0.324075	1.896	64325.4	0.0250918
			33	GM1a 37:2;O2	[M-H]-	1556.87	1556.88	7.38662	1.908	5013	0.00195545
			34	GM1a 38:2;O2	[M-H]-	1570.89	1570.89	4.32877	1.919	50123	0.0195517
			35	GM1a 39:2;O2	[M-H]-	1584.9	1584.91	8.70717	1.92	4840	0.00188796
			36	GM1a 40:2;O2	[M-H]-	1598.92	1598.92	2.81441	1.925	50123	0.0195517
			37	GM1a 41:2;O2	[M-H]-	1612.93	1612.94	4.27792	1.932	11657	0.00454711
			38	GM1a 42:2;O2	[M-H]-	1626.95	1626.96	4.88645	1.945	88187	0.0343996
			39	GM1a 43:2;O2	[M-H]-	1640.96	1640.98	8.22687	1.953	16553	0.00645692
			40	GM1a 44:2;O2	[M-H]-	1654.98	1654.99	3.77648	1.964	13660	0.00532843
			41	GM1a 42:3;O2	[M-H]-	1624.93	1624.94	6.80028	1.934	9426	0.00367685
			42	GM1a 36:0;O3	[M-H]-	1562.88	1562.89	5.62423	1.881	16864	0.00657823
5	GM1a(NeuGc)	7.56	43	GM1a(NeuGc) 36:1;O2	[M-H]-	1560.86	1560.87	5.69556	1.916	19807	0.00772622
			44	GM1a(NeuGc) 38:1;O2	[M-H]-	1588.9	1588.91	9.5601	1.936	10528	0.00410671
			45	GM1a(NeuGc) 36:2;O2	[M-H]-	1558.85	1558.85	2.68788	1.914	1987	0.00077508
6	GM1b	7.8	46	GM1b 33:1;O2	[M-2H]2-	736.892	736.894	2.54447	0.9	5257	0.00205063
			47	GM1b 34:1;O2	[M-2H]2-	750.908	750.911	4.2948	0.908	9712	0.00378841
			48	GM1b 35:1;O2	[M-2H]2-	764.923	764.927	5.45806	0.919	13959	0.00544506
			49	GM1b 36:1;O2	[M-2H]2-	771.931	771.934	3.69204	0.947	77055	0.0300573
			50	GM1b 37:1;O2	[M-2H]2-	778.939	778.941	3.24159	0.954	2346	0.000915117
			51	GM1b 38:1;O2	[M-2H]2-	785.947	785.95	3.68982	0.961	46346	0.0180784
			52	GM1b 39:1;O2	[M-2H]2-	792.955	792.958	4.13012	0.948	13230	0.0051607
			53	GM1b 40:1;O2	[M-2H]2-	799.962	799.965	2.81263	0.974	2445	0.000953734
			54	GM1b 35:2;O2	[M-2H]2-	763.915	763.919	5.07255	0.919	1665	0.000649476
			55	GM1b 36:2;O2	[M-2H]2-	770.923	770.927	4.8643	0.947	3045	0.00118778
			56	GM1b 38:2;O2	[M-2H]2-	784.939	784.94	1.27398	0.96	3848	0.00150101
			57	GM1b 39:2;O2	[M-2H]2-	791.947	791.949	2.7464	0.95	12833	0.00500584
7	Fuc-GM1a	7.9	58	Fuc-GM1a 34:1;O2	[M-2H]2-	830.943	830.947	4.33243	1.004	7878	0.00307301
			59	Fuc-GM1a 35:1;O2	[M-2H]2-	837.951	837.958	8.56255	1.007	2999	0.00116984
			60	Fuc-GM1a 36:1;O2	[M-2H]2-	844.959	844.962	3.84634	1.015	617252	0.240775
			61	Fuc-GM1a 37:1;O2	[M-2H]2-	851.966	851.971	5.89812	1.02	15044	0.00586829
			62	Fuc-GM1a 38:1;O2	[M-2H]2-	858.974	858.979	5.23881	1.027	431643	0.168373
			63	Fuc-GM1a 39:1;O2	[M-2H]2-	865.982	865.985	3.43541	1.032	7331	0.00285964
			64	Fuc-GM1a 40:1;O2	[M-2H]2-	872.99	872.996	7.1593	1.036	13045	0.00508853
			65	Fuc-GM1a 41:1;O2	[M-2H]2-	879.998	879.997	-0.653411	1.04	3597	0.0014031
			66	Fuc-GM1a 36:2;O2	[M-2H]2-	843.951	843.953	2.31056	1.016	32210	0.0125643
			67	Fuc-GM1a 37:2;O2	[M-2H]2-	850.959	850.963	5.0825	1.02	3891	0.00151778
			68	Fuc-GM1a 38:2;O2	[M-2H]2-	857.967	857.97	3.8463	1.027	25365	0.00989426
			69	Fuc-GM1a 40:2;O2	[M-2H]2-	871.982	871.986	4.87395	1.035	4886	0.00190591
			70	Fuc-GM1a 42:2;O2	[M-2H]2-	885.998	886.002	5.19189	1.043	9683	0.0037771
			71	Fuc-GM1a 43:2;O2	[M-2H]2-	893.006	893.01	4.89919	1.046	1093	0.000426352
			72	Fuc-GM1a 44:2;O2	[M-2H]2-	900.013	900.01	-3.83328	1.052	1005	0.000392026
			73	Fuc-GM1a 36:0;O3	[M-2H]2-	853.982	853.979	-3.69446	1.013	4072	0.00158839
8	Fuc-GM1a(NeuGc)	8.4	74	Fuc-GM1a(NeuGc) 36:1;O2	[M-2H]2-	852.974	852.979	5.79736	1.031	17059	0.0066543
			75	Fuc-GM1a(NeuGc) 38:1;O2	[M-2H]2-	866.99	866.988	-2.19726	1.039	13400	0.00522701
9	GalNAc-GM1b	8.2	76	GalNAc-GM1b 36:1;O2	[M-2H]2-	873.471	873.474	3.43457	1.025	25344	0.00988607
			77	GalNAc-GM1b 38:1;O2	[M-2H]2-	887.486	887.49	3.83104	1.04	19787	0.00771842
			78	GalNAc-GM1b 36:2;O2	[M-2H]2-	872.463	872.465	2.5216	1.026	2784	0.00108597
			79	GalNAc-GM1b 38:2;O2	[M-2H]2-	886.479	886.481	2.36892	1.037	4424	0.00172569
10	O-Ac-GD3	5.43	80	O-Ac-GD3 34:1;O2	[M-2H]2-	741.902	741.903	1.07831	0.901	10176	0.00396941
			81	O-Ac-GD3 35:1;O2	[M-2H]2-	748.91	748.916	7.41077	0.902	2953	0.00115189
			82	O-Ac-GD3 36:1;O2	[M-2H]2-	755.918	755.921	3.70411	0.91	502949	0.196188
			83	O-Ac-GD3 37:1;O2	[M-2H]2-	762.926	762.927	1.24521	0.917	7828	0.00305351
			84	O-Ac-GD3 38:1;O2	[M-2H]2-	769.934	769.937	4.1562	0.922	86976	0.0339272
			85	O-Ac-GD3 39:1;O2	[M-2H]2-	776.941	776.941	-0.450484	0.93	7149	0.00278865
			86	O-Ac-GD3 40:1;O2	[M-2H]2-	783.949	783.95	0.765356	0.936	39374	0.0153588
			87	O-Ac-GD3 41:1;O2	[M-2H]2-	790.957	790.956	-0.948218	0.944	32748	0.0127742
			88	O-Ac-GD3 36:2;O2	[M-2H]2-	754.91	754.913	3.17919	0.913	16389	0.00639295
			89	O-Ac-GD3 38:2;O2	[M-2H]2-	768.926	768.93	5.59222	0.929	4784	0.00186612
			90	O-Ac-GD3 40:2;O2	[M-2H]2-	782.941	782.945	4.98122	0.937	8378	0.00326805
			91	O-Ac-GD3 41:2;O2	[M-2H]2-	789.949	789.951	2.46851	0.942	12730	0.00496566
			92	O-Ac-GD3 42:2;O2	[M-2H]2-	796.957	796.958	1.25477	0.951	58958	0.0229981
			93	O-Ac-GD3 43:2;O2	[M-2H]2-	803.965	803.967	2.17671	0.959	7257	0.00283078
11	GD3	6.94	94	GD3 34:1;O2	[M-2H]2-	720.897	720.899	3.19047	0.886	14693	0.00573138
			95	GD3 35:1;O2	[M-2H]2-	727.905	727.905	0.206071	0.888	1903	0.000742313
			96	GD3 36:1;O2	[M-2H]2-	734.913	734.914	1.76892	0.896	448855	0.175087
			97	GD3 37:1;O2	[M-2H]2-	741.921	741.922	1.28046	0.904	21035	0.00820524
			98	GD3 38:1;O2	[M-2H]2-	748.928	748.929	0.934669	0.909	130124	0.0507582
			99	GD3 39:1;O2	[M-2H]2-	755.936	755.929	-9.55768	0.916	42296	0.0164986
			100	GD3 40:1;O2	[M-2H]2-	762.944	762.945	0.786427	0.924	44086	0.0171969
			101	GD3 41:1;O2	[M-2H]2-	769.953	769.951	-2.3378	0.931	45422	0.017718
			102	GD3 36:2;O2	[M-2H]2-	733.905	733.905	0.136257	0.898	17187	0.00670423
			103	GD3 38:2;O2	[M-2H]2-	747.921	747.922	1.47074	0.908	11938	0.00465672
			104	GD3 40:2;O2	[M-2H]2-	761.936	761.938	2.23116	0.924	8001	0.00312099
			105	GD3 41:2;O2	[M-2H]2-	768.945	768.946	1.30048	0.93	16255	0.00634068
			106	GD3 42:2;O2	[M-2H]2-	775.953	775.952	-1.48205	0.94	68397	0.02668
			107	GD3 43:2;O2	[M-2H]2-	782.961	782.963	2.20317	0.947	8391	0.00327312
			108	GD3 44:2;O2	[M-2H]2-	789.969	789.966	-3.82927	0.952	13665	0.00533038
			109	GD3 42:3;O2	[M-2H]2-	774.945	774.949	4.58097	0.937	9487	0.00370065
12	GD3(NeuGc)	7.22	110	GD3(NeuGc) 36:1;O2	[M-2H]2-	742.892	742.895	4.09212	0.9	26619	0.0103834
			111	GD3(NeuGc) 38:1;O2	[M-2H]2-	756.908	756.901	-8.33655	0.913	14962	0.00583631
			112	GD3(NeuGc) 40:1;O2	[M-2H]2-	770.923	770.922	-2.28298	0.929	6407	0.00249921
13	GD3(NeuGc)#	7.47	113	GD3(NeuGc)# 36:1;O2	[M-2H]2-	742.892	742.893	1.39993	0.9	11401	0.00444725
			114	GD3(NeuGc)# 38:1;O2	[M-2H]2-	756.908	756.908	0.647371	0.913	10015	0.00390661
			115	GD3(NeuGc)# 40:1;O2	[M-2H]2-	770.923	770.918	-7.08242	0.929	4773	0.00186183
14	O-Ac-GD2	6.93	116	O-Ac-GD2 36:1;O2	[M-2H]2-	857.458	857.461	3.61534	0.991	6028	0.00235137
			117	O-Ac-GD2 38:1;O2	[M-2H]2-	871.473	871.472	-1.03273	0.997	3341	0.00130324
15	GD2	7.98	118	GD2 36:1;O2	[M-2H]2-	836.452	836.455	2.98881	0.969	15948	0.00622092
			119	GD2 38:1;O2	[M-2H]2-	850.468	850.473	5.87912	0.976	16010	0.00624511
16	O-Ac-GD1a	7.57	120	O-Ac-GD1a 36:1;O2	[M-2H]2-	938.484	938.487	3.51631	1.06	65064	0.0253799
			121	O-Ac-GD1a 38:1;O2	[M-2H]2-	952.5	952.502	2.46719	1.071	77771	0.0303366
			122	O-Ac-GD1a 36:2;O2	[M-2H]2-	937.476	937.473	-3.94677	1.058	15704	0.00612574
			123	O-Ac-GD1a 38:2;O2	[M-2H]2-	951.492	951.494	2.46981	1.07	11629	0.00453619
17	O-Ac-GD1b	8.19	124	O-Ac-GD1b 36:1;O2	[M-2H]2-	938.484	938.487	3.62286	1.057	182685	0.0712609
			125	O-Ac-GD1b 38:1;O2	[M-2H]2-	952.5	952.503	2.99213	1.065	136756	0.0533452
			126	O-Ac-GD1b 36:2;O2	[M-2H]2-	937.476	937.475	-0.960024	1.056	19425	0.00757721
			127	O-Ac-GD1b 38:2;O2	[M-2H]2-	951.492	951.496	3.83608	1.067	17836	0.00695738
18	O-Ac-GD1c	8.8	128	O-Ac-GD1c 36:1;O2	[M-2H]2-	938.484	938.49	6.81951	1.053	26155	0.0102024
			129	O-Ac-GD1c 38:1;O2	[M-2H]2-	952.5	952.501	1.73228	1.063	32659	0.0127395
19	GD1a	8.59	130	GD1a 34:1;O2	[M-2H]2-	903.463	903.466	2.87782	1.034	37182	0.0145038
			131	GD1a 35:1;O2	[M-2H]2-	910.471	910.471	0.549166	1.038	16506	0.00643858
			132	GD1a 36:1;O2	[M-2H]2-	917.479	917.481	2.61586	1.051	2563607	1
			133	GD1a 37:1;O2	[M-2H]2-	924.487	924.487	0.757177	1.058	50788	0.0198111
			134	GD1a 38:1;O2	[M-2H]2-	931.494	931.497	2.20076	1.065	1989385	0.77601
			135	GD1a 39:1;O2	[M-2H]2-	938.502	938.503	0.213105	1.068	27602	0.0107669
			136	GD1a 40:1;O2	[M-2H]2-	945.51	945.512	2.32679	1.07	104984	0.0409517
			137	GD1a 41:1;O2	[M-2H]2-	952.518	952.514	-3.77946	1.072	26339	0.0102742
			138	GD1a 36:2;O2	[M-2H]2-	916.471	916.472	1.20026	1.05	95854	0.0373903
			139	GD1a 37:2;O2	[M-2H]2-	923.479	923.488	9.74576	1.056	12339	0.00481314
			140	GD1a 38:2;O2	[M-2H]2-	930.487	930.488	1.07471	1.066	107348	0.0418738
			141	GD1a 42:2;O2	[M-2H]2-	958.518	958.52	2.19088	1.076	33101	0.0129119
			142	GD1a 43:2;O2	[M-2H]2-	965.526	965.527	1.32052	1.078	4312	0.00168201
			143	GD1a 44:2;O2	[M-2H]2-	972.534	972.539	5.19262	1.082	4374	0.00170619
			144	GD1a 36:0;O3	[M-2H]2-	926.484	926.488	4.25803	1.051	23813	0.00928887
			145	GD1a 38:0;O3	[M-2H]2-	940.5	940.502	2.65285	1.064	31951	0.0124633
20	GD1b	9.08	146	GD1b 34:1;O2	[M-2H]2-	903.463	903.467	4.64878	1.029	17191	0.00670579
			147	GD1b 35:1;O2	[M-2H]2-	910.471	910.472	1.20817	1.032	6957	0.00271375
			148	GD1b 36:1;O2	[M-2H]2-	917.479	917.482	3.37882	1.04	927496	0.361793
			149	GD1b 37:1;O2	[M-2H]2-	924.487	924.486	-0.540841	1.046	28886	0.0112677
			150	GD1b 38:1;O2	[M-2H]2-	931.494	931.503	8.6957	1.052	1091326	0.425699
			151	GD1b 39:1;O2	[M-2H]2-	938.502	938.504	1.27863	1.058	23725	0.00925454
			152	GD1b 40:1;O2	[M-2H]2-	945.51	945.513	3.38442	1.063	61325	0.0239214
			153	GD1b 41:1;O2	[M-2H]2-	952.518	952.518	-0.314955	1.067	20120	0.00784832
			154	GD1b 36:2;O2	[M-2H]2-	916.471	916.473	2.50963	1.039	36132	0.0140942
			155	GD1b 37:2;O2	[M-2H]2-	923.479	923.476	-2.49058	1.043	9940	0.00387735
			156	GD1b 38:2;O2	[M-2H]2-	930.487	930.488	1.18218	1.052	46005	0.0179454
			157	GD1b 42:2;O2	[M-2H]2-	958.518	958.523	5.42504	1.069	25442	0.0099243
			158	GD1b 43:2;O2	[M-2H]2-	965.526	965.531	5.04906	1.075	4374	0.00170619
			159	GD1b 44:2;O2	[M-2H]2-	972.534	972.533	-0.771182	1.082	5175	0.00201864
21	GD1c	9.54	160	GD1c 36:1;O2	[M-2H]2-	917.479	917.482	3.26983	1.024	54529	0.0212704
			161	GD1c 38:1;O2	[M-2H]2-	931.494	931.499	4.9383	1.039	91189	0.0355706
			162	GD1c 36:2;O2	[M-2H]2-	916.471	916.477	6.43774	1.02	14473	0.00564556
			163	GD1c 38:2;O2	[M-2H]2-	930.487	930.487	0.967236	1.036	14025	0.00547081
22	GD1a(NeuGc)	9.06	164	GD1a(NeuGc) 36:1;O2	[M-2H]2-	925.476	925.481	4.58683	1.063	62581	0.0244113
			165	GD1a(NeuGc) 38:1;O2	[M-2H]2-	939.492	939.496	4.19908	1.07	53804	0.0209876
23	GD1b(NeuGc)#	9.18	166	GD1b(NeuGc)# 36:1;O2	[M-2H]2-	925.476	925.479	3.18215	1.049	41466	0.0161749
			167	GD1b(NeuGc)# 38:1;O2	[M-2H]2-	939.492	939.493	0.899422	1.062	23991	0.0093583
24	GD1b(NeuGc)	9.53	168	GD1b(NeuGc) 36:1;O2	[M-2H]2-	925.476	925.483	7.18009	1.043	15435	0.00602081
			169	GD1b(NeuGc) 38:1;O2	[M-2H]2-	939.492	939.495	3.66688	1.051	17838	0.00695816
25	GalNAc-GD1a	8.94	170	GalNAc-GD1a 34:1;O2	[M-2H]2-	1005	1005.01	6.46764	1.121	4065	0.00158566
			171	GalNAc-GD1a 36:1;O2	[M-2H]2-	1019.02	1019.02	3.77815	1.132	279349	0.108967
			172	GalNAc-GD1a 37:1;O2	[M-2H]2-	1026.03	1026.03	2.94827	1.138	8059	0.00314362
			173	GalNAc-GD1a 38:1;O2	[M-2H]2-	1033.03	1033.04	4.64651	1.142	198082	0.0772669
			174	GalNAc-GD1a 39:1;O2	[M-2H]2-	1040.04	1040.05	3.62966	1.148	3940	0.0015369
			175	GalNAc-GD1a 40:1;O2	[M-2H]2-	1047.05	1047.05	4.25004	1.151	6757	0.00263574
			176	GalNAc-GD1a 36:2;O2	[M-2H]2-	1018.01	1018.02	4.56773	1.13	18292	0.00713526
			177	GalNAc-GD1a 38:2;O2	[M-2H]2-	1032.03	1032.03	2.03483	1.14	18408	0.00718051
			178	GalNAc-GD1a 42:2;O2	[M-2H]2-	1060.06	1060.06	3.39604	1.158	4343	0.0016941
26	Fuc-GD1b-O-Ac	8.93	179	Fuc-GD1b-O-Ac 36:1;O2	[M-2H]2-	1011.51	1011.52	4.44878	1.103	34869	0.0136015
			180	Fuc-GD1b-O-Ac 38:1;O2	[M-2H]2-	1025.53	1025.53	4.92429	1.113	51865	0.0202313
			181	Fuc-GD1b-O-Ac 36:2;O2	[M-2H]2-	1010.51	1010.51	2.37505	1.103	4896	0.00190981
			182	Fuc-GD1b-O-Ac 38:2;O2	[M-2H]2-	1024.52	1024.52	1.22008	1.112	5331	0.00207949
27	Fuc-GD1b	9.74	183	Fuc-GD1b 35:1;O2	[M-2H]2-	983.5	983.506	5.82105	1.082	1007	0.000392806
			184	Fuc-GD1b 36:1;O2	[M-2H]2-	990.508	990.512	4.34121	1.087	230386	0.0898679
			185	Fuc-GD1b 37:1;O2	[M-2H]2-	997.516	997.521	5.08764	1.088	9344	0.00364486
			186	Fuc-GD1b 38:1;O2	[M-2H]2-	1004.52	1004.53	4.47974	1.095	335329	0.130804
			187	Fuc-GD1b 39:1;O2	[M-2H]2-	1011.53	1011.54	7.48865	1.101	1256	0.000489935
			188	Fuc-GD1b 40:1;O2	[M-2H]2-	1018.54	1018.54	2.99449	1.104	27871	0.0108718
			189	Fuc-GD1b 36:2;O2	[M-2H]2-	989.5	989.503	3.43608	1.084	10004	0.00390231
			190	Fuc-GD1b 38:2;O2	[M-2H]2-	1003.52	1003.52	1.99299	1.094	16956	0.00661412
			191	Fuc-GD1b 42:2;O2	[M-2H]2-	1031.55	1031.55	1.84189	1.11	7115	0.00277539
28	O-Ac-GT3	7.97	192	O-Ac-GT3 36:1;O2	[M-2H]2-	901.466	901.469	4.10443	1.031	51564	0.0201138
			193	O-Ac-GT3 38:1;O2	[M-2H]2-	915.481	915.485	3.76851	1.044	13554	0.00528708
			194	O-Ac-GT3 36:2;O2	[M-2H]2-	900.458	900.462	4.66429	1.031	3031	0.00118232
			195	O-Ac-GT3 38:2;O2	[M-2H]2-	914.474	914.48	7.49065	1.042	4385	0.00171048
29	GT3	9	196	GT3 36:1;O2	[M-2H]2-	880.46	880.464	3.74804	1.022	14469	0.005644
			197	GT3 38:1;O2	[M-2H]2-	894.476	894.479	3.52161	1.029	4352	0.00169761
			198	GT3 36:2;O2	[M-2H]2-	879.453	879.452	-0.909657	1.022	1005	0.000392026
30	O-Ac-GT1a	8.91	199	O-Ac-GT1a 36:1;O2	[M-2H]2-	1084.03	1084.04	4.42791	1.151	18607	0.00725813
			200	O-Ac-GT1a 38:1;O2	[M-2H]2-	1098.05	1098.05	3.36962	1.159	27838	0.0108589
			201	O-Ac-GT1a 36:2;O2	[M-2H]2-	1082.02	1082.02	6.56182	1.132	8827	0.0034432
			202	O-Ac-GT1a 38:2;O2	[M-2H]2-	1097.04	1097.04	0.82039	1.144	12570	0.00490325
31	O-Ac-GT1b	9.69	203	O-Ac-GT1b 36:1;O2	[M-2H]2-	1084.03	1084.04	4.42791	1.131	79206	0.0308963
			204	O-Ac-GT1b 38:1;O2	[M-2H]2-	1098.05	1098.05	4.00711	1.141	111456	0.0434762
32	GT1a	9.99	205	GT1a 36:1;O2	[M-2H]2-	1063.03	1063.03	4.70355	1.146	36810	0.0143587
			206	GT1a 37:1;O2	[M-2H]2-	1070.03	1070.03	-0.841095	1.15	1171	0.000456778
			207	GT1a 38:1;O2	[M-2H]2-	1077.04	1077.05	3.80672	1.156	43019	0.0167807
			208	GT1a 39:1;O2	[M-2H]2-	1084.03	1084.04	3.78218	1.118	5964	0.00232641
			209	GT1a 36:2;O2	[M-2H]2-	1062.02	1062.02	2.25985	1.146	2895	0.00112927
			210	GT1a 38:2;O2	[M-2H]2-	1076.03	1076.04	2.69508	1.154	1059	0.00041309
33	GT1b	10.4	211	GT1b 34:1;O2	[M-2H]2-	1049.01	1049.01	3.71779	1.1	5014	0.00195584
			212	GT1b 35:1;O2	[M-2H]2-	1056.02	1056.03	8.33319	1.109	2268	0.000884691
			213	GT1b 36:1;O2	[M-2H]2-	1063.03	1063.03	3.76284	1.111	485538	0.189396
			214	GT1b 37:1;O2	[M-2H]2-	1070.03	1070.04	3.83165	1.116	19200	0.00748945
			215	GT1b 38:1;O2	[M-2H]2-	1077.04	1077.05	4.08526	1.123	561315	0.218955
			216	GT1b 39:1;O2	[M-2H]2-	1084.05	1084.04	-8.76343	1.131	24572	0.00958493
			217	GT1b 40:1;O2	[M-2H]2-	1091.06	1091.06	5.13263	1.137	46644	0.0181947
			218	GT1b 41:1;O2	[M-2H]2-	1098.07	1098.06	-8.74265	1.142	24278	0.00947025
			219	GT1b 42:1;O2	[M-2H]2-	1104.07	1104.07	1.65751	1.145	15471	0.00603486
			220	GT1b 36:2;O2	[M-2H]2-	1062.02	1062.02	4.42553	1.114	19809	0.007727
			221	GT1b 38:2;O2	[M-2H]2-	1076.03	1076.03	-5.01843	1.129	40042	0.0156194
			222	GT1b 36:0;O3	[M-2H]2-	1072.03	1072.03	0.699606	1.125	5367	0.00209353
34	GT1b(NeuGc)	10.5	223	GT1b(NeuGc) 36:1;O2	[M-2H]2-	1071.02	1071.03	4.34164	1.111	22203	0.00866084
			224	GT1b(NeuGc) 38:1;O2	[M-2H]2-	1085.04	1085.04	1.01379	1.122	25714	0.0100304
35	GT1b(NeuGc)#	10.8	225	GT1b(NeuGc)# 36:1;O2	[M-2H]2-	1071.02	1071.03	4.34164	1.118	16472	0.00642532
			226	GT1b(NeuGc)# 38:1;O2	[M-2H]2-	1085.04	1085.04	4.14731	1.128	16815	0.00655912
36	GalNAc-GT1b	10.68	227	GalNAc-GT1b 36:1;O2	[M-2H]2-	1164.57	1164.56	-8.75863	1.184	7252	0.00282883
			228	GalNAc-GT1b 38:1;O2	[M-2H]2-	1178.58	1178.57	-7.55145	1.194	7358	0.00287017
37	Di-O-Ac-GQ1b	9.92	229	Di-O-Ac-GQ1b 36:1;O2	[M-2H]2-	1250.58	1250.6	8.23615	1.22	12379	0.00482874
			230	Di-O-Ac-GQ1b 38:1;O2	[M-2H]2-	1264.6	1264.61	4.70504	1.229	10809	0.00421632
38	O-Ac-GQ1b	10.56	231	O-Ac-GQ1b 36:1;O2	[M-2H]2-	1229.58	1229.58	3.9851	1.204	19954	0.00778356
			232	O-Ac-GQ1b 38:1;O2	[M-2H]2-	1243.6	1243.6	3.85978	1.216	28033	0.010935
39	O-Ac-GQ1b#	10.94	233	O-Ac-GQ1b# 36:1;O2	[M-2H]2-	1229.58	1229.58	-1.21993	1.22	11667	0.00455101
			234	O-Ac-GQ1b# 38:1;O2	[M-2H]2-	1243.6	1243.6	4.58349	1.225	18044	0.00703852
40	GQ1b	11.53	235	GQ1b 36:1;O2	[M-2H]2-	1208.57	1208.58	2.23404	1.197	15953	0.00622287
			236	GQ1b 38:1;O2	[M-2H]2-	1222.59	1222.6	5.31658	1.21	21412	0.00835229
			237	GQ1b 40:1;O2	[M-2H]2-	1236.61	1236.6	-6.10542	1.222	4079.71	0.0015914
			238	GQ1b 38:2;O2	[M-2H]2-	1221.58	1221.58	-4.99352	1.21	2285.28	0.000891431
			239	GQ1b 42:2;O2	[M-2H]2-	1249.61	1249.62	6.08188	1.228	1408.77	0.000549526

## Sheet: Table S3 chain
Table S2. List of 184 gangliosides identified at chain composition level in porcine brain
Number of Species	Species	Number of Chain Composition Level	Chain Dignostic Ions	Chain Composition Level	#1 %Rel Abundances	#2 %Rel Abundances	#3 %Rel Abundances	Average	SD	RSD
1	GM3 34:1;O2	1	264.3	GM3 18:1;O2/16:0	0.9036	0.896	0.9307	0.9101	0.0182403	0.0200421
		2	236.24	GM3 16:1;O2/18:0	0.0843	0.0932	0.0922	0.0899	0.00487545	0.0542319
2	GM3 35:1;O2	3	250.25	GM3 17:1;O2/18:0	0.2863	0.2631	0.283933	0.277778	0.0127663	0.0459586
		4	264.27	GM3 18:1;O2/17:0	0.7126	0.7362	0.717867	0.722222	0.0123882	0.0171529
3	GM3 36:1;O2	5	264.3	GM3 18:1;O2/18:0	1	1	1	1	0	0
4	GM3 36:2;O2	6	262.3	GM3 18:2;O2/18:0	0.9136	0.8931	0.903725	0.903475	0.0102523	0.0113476
		7	264.3	GM3 18:1;O2/18:1	0.0891	0.0965	0.103975	0.0965251	0.00743768	0.0770543
5	GM3 37:1;O2	8	264.3	GM3 18:1;O2/19:1	0.7326	0.7126	0.724031	0.723077	0.0100341	0.0138769
		9	250.3	GM3 17:1;O2/20:1	0.2961	0.2863	0.248369	0.276923	0.0252092	0.0910331
6	GM3 38:1;O2	10	264.3	GM3 18:1;O2/20:0	0.3862	0.3465	0.402435	0.378378	0.0287762	0.0760513
		11	292.3	GM3 20:1;O2/18:0	0.6235	0.6235	0.617865	0.621622	0.00325345	0.00523381
7	GM3 38:2;O2	12	292.3	GM3 20:1;O2/18:1	0.2346	0.2613	0.266005	0.253968	0.0169376	0.0666916
		13	290.28	GM3 20:2;O2/18:0	0.4962	0.5063	0.509405	0.503968	0.00690429	0.0136999
		14	264.27	GM3 18:1;O2/20:1	0.1463	0.1263	0.132162	0.134921	0.0102814	0.0762036
		15	262.25	GM3 18:2;O2/20:0	0.1056	0.1132	0.102629	0.107143	0.00545198	0.0508851
8	GM3 39:1;O2	16	264.3	GM3 18:1;O2/21:0	0.7963	0.8046	0.797847	0.799582	0.00441366	0.00551995
		17	250.3	GM3 17:1;O2/22:0	0.1256	0.1465	0.134998	0.135699	0.0104676	0.0771384
		18	278.28	GM3 19:1;O2/20:0	0.0213	0.0193	0.0220305	0.0208768	0.00141357	0.0677101
		19	292.3	GM3 20:1;O2/19:0	0.0436	0.0456	0.042324	0.0438413	0.00165128	0.0376648
9	GM3 40:1;O2	20	264.3	GM3 18:1;O2/22:0	0.7936	0.7631	0.812348	0.789683	0.0248564	0.0314765
		21	292.3	GM3 20:1;O2/20:0	0.2242	0.2016	0.205152	0.210317	0.0121531	0.0577847
10	GM3 40:2;O2	22	264.3	GM3 18:1;O2/22:1	0.8056	0.8246	0.8073	0.8125	0.0105133	0.0129395
		23	262.3	GM3 18:2;O2/22:0	0.0823	0.0845	0.0832	0.0833333	0.00110604	0.0132725
		24	292.29	GM3 20:1;O2/20:1	0.1046	0.1123	0.0956	0.104167	0.00835843	0.0802409
11	GM3 41:1;O2	25	264.3	GM3 18:1;O2/23:0	1	1	1	1	0	0
12	GM3 42:1;O2	26	264.2	GM3 18:1;O2/24:0	1	1	1	1	0	0
13	GM3 42:2;O2	27	264.27	GM3 18:1;O2/24:1	0.9656	0.9943	0.934669	0.964856	0.0298226	0.0309089
		28	262.3	GM3 18:2;O2/24:0	0.0326	0.0326	0.0402313	0.0351438	0.00440594	0.125369
14	GM2 36:1;O2	29	264.3	GM2 18:1;O2/18:0	0.9156	0.9216	0.837609	0.891603	0.0468562	0.0525528
		30	236.3	GM2 16:1;O2/20:0	0.1056	0.1163	0.103291	0.108397	0.00694095	0.0640327
15	GM2 36:2;O2	31	262.3	GM2 18:2;O2/16:0	1	1	1	1	0	0
16	GM2 38:1;O2	32	264.3	GM2 18:1;O2/20:0	0.3465	0.3651	0.34855	0.353383	0.0101985	0.0288595
		33	292.3	GM2 20:1;O2/18:0	0.6456	0.6651	0.62915	0.646617	0.0179967	0.0278322
17	O-Ac-GM1a 36:1;O2	34	264.3	GM2 18:1;O2/18:0	1	1	1	1	0	0
18	GM1a 34:1;O2	35	264.3	GM1a 18:1;O2/16:0	1	1	1	1	0	0
19	GM1a 36:1;O2	36	264.3	GM1a 18:1;O2/18:0	0.9953	0.9763	0.98637	0.98599	0.00950571	0.00964077
		37	236.3	GM1a 16:1;O2/20:0	0.0046	0.0049	0.0041312	0.00454373	0.000387476	0.085277
		38	292.3	GM1a 20:1;O2/16:0	0.0102	0.0091	0.00909833	0.00946611	0.000635567	0.0671413
20	GM1a 36:2;O2	39	262.3	GM1a 18:2;O2/18:0	0.6321	0.6451	0.604433	0.627211	0.0207698	0.0331146
		40	264.3	GM1a 18:1;O2/18:1	0.3831	0.3643	0.370967	0.372789	0.00953148	0.025568
21	GM1a 38:1;O2	41	264.3	GM1a 18:1;O2/20:0	0.1456	0.1383	0.155652	0.146517	0.00871211	0.0594613
		42	292.3	GM1a 20:1;O2/18:0	0.8446	0.8656	0.850248	0.853483	0.0108672	0.0127328
22	GM1a 38:2;O2	43	264.3	GM1a 18:1;O2/20:1	0.2436	0.2536	0.230073	0.242424	0.0118076	0.0487064
		44	290.3	GM1a 20:2;O2/18:0	0.3675	0.3946	0.384753	0.382284	0.0137176	0.0358833
		45	292.3	GM1a 20:1;O2/18:1	0.3851	0.3953	0.345474	0.375291	0.0263213	0.0701357
23	GM1a 39:1;O2	46	264.3	GM1a 18:1;O2/21:0	1	1	1	1	0	0
24	GM1a 40:1;O2	47	264.26	GM1a 18:1;O2/22:0	0.7013	0.7321	0.717543	0.716981	0.0154077	0.0214897
		48	292.3	GM1a 20:1;O2/20:0	0.2913	0.2812	0.276557	0.283019	0.00753811	0.0266347
25	GM1a 41:1;O2	49	264.26	GM1a 18:1;O2/23:0	0.4456	0.4326	0.478322	0.452174	0.0235591	0.0521019
		50	250.24	GM1a 17:1;O2/24:0	0.5312	0.5521	0.560178	0.547826	0.0149544	0.0272977
26	GM1a 42:2;O2	51	264.26	GM1a 18:1;O2/C23:1	1	1	1	1	0	0
27	GM1a 43:2;O2	52	264.26	GM1a 18:1;O2/C25:1	1	1	1	1	0	0
28	GM1a(NeuGc) 36:1;O2	53	264.26	GM1a(NeuGc) 18:1;O2/18:0	1	1	1	1	0	0
29	GM1a(NeuGc) 38:1;O2	54	264.26	GM1a(NeuGc) 18:1;O2/20:0	0.2863	0.2931	0.269657	0.283019	0.0120612	0.0426162
		55	292.3	GM1a(NeuGc) 20:1;O2/18:0	0.7231	0.7321	0.695743	0.716981	0.0189349	0.0264092
30	GM1b 36:1;O2	56	264.26	GM1b 18:1;O2/18:0	1	1	1	1	0	0
31	GM1b 38:1;O2	57	264.26	GM1b 18:1;O2/20:0	0.3561	0.3652	0.3167	0.346	0.0257793	0.0745065
		58	292.3	GM1b 20:1;O2/18:0	0.6652	0.6213	0.6755	0.654	0.0287835	0.0440115
32	Fuc-GM1a 36:1;O2	59	264.3	Fuc-GM1a 18:1;O2/18:0	0.9516	0.9813	0.981516	0.971472	0.01721	0.0177154
		60	292.3	Fuc-GM1a 20:1;O2/16:0	0.0286	0.0265	0.0304839	0.028528	0.00199291	0.0698582
33	Fuc-GM1a 36:2;O2	61	262.3	Fuc-GM1a 18:2;O2/18:0	1	1	1	1	0	0
34	Fuc-GM1a 38:1;O2	62	264.3	Fuc-GM1a 18:1;O2/20:0	0.1449	0.1665	0.155757	0.155719	0.0108	0.0693561
		63	292.3	Fuc-GM1a 20:1;O2/18:0	0.8126	0.8315	0.837756	0.827285	0.0130968	0.0158311
		64	236.3	Fuc-GM1a 16:1;O2/22:0	0.0178	0.0181	0.0150876	0.0169959	0.0016594	0.0976356
35	Fuc-GM1a 38:2;O2	65	264.3	Fuc-GM1a 18:1;O2/20:1	0.3612	0.3461	0.330083	0.345794	0.0155607	0.0449998
		66	292.3	Fuc-GM1a 20:1;O2/18:1	0.6651	0.6413	0.656217	0.654206	0.0120268	0.0183838
36	Fuc-GM1a 40:1;O2	67	264.27	Fuc-GM1a 18:1;O2/22:0	1	1	1	1	0	0
37	Fuc-GM1a(NeuGc) 36:1;O2	68	264.27	Fuc-GM1a(NeuGc) 18:1;O2/18:0	1	1	1	1	0	0
38	Fuc-GM1a(NeuGc) 38:1;O2	69	292.3	Fuc-GM1a(NeuGc) 20:1;O2/18:0	1	1	1	1	0	0
39	GalNAc-GM1b 36:1;O2	70	264.27	GalNAc-GM1b 18:1;O2/18:0	1	1	1	1	0	0
40	GalNAc-GM1b 38:1;O2	71	292.3	GalNAc-GM1b 20:1;O2/18:0	1	1	1	1	0	0
41	O-Ac-GD3 36:1;O2	72	264.27	O-Ac-GD3 18:1;O2/18:0	1	1	1	1	0	0
42	O-Ac-GD3 36:2;O2	73	262.27	O-Ac-GD3 18:2;O2/18:0	1	1	1	1	0	0
43	O-Ac-GD3 38:1;O2	74	264.27	O-Ac-GD3 18:1;O2/20:0	0.4762	0.4652	0.483142	0.474847	0.0090471	0.0190526
		75	292.3	O-Ac-GD3 20:1;O2/18:0	0.5312	0.5416	0.502658	0.525153	0.0201629	0.0383944
44	O-Ac-GD3 40:1;O2	76	264.27	O-Ac-GD3 18:1;O2/20:0	1	1	1	1	0	0
45	O-Ac-GD3 41:1;O2	77	264.27	O-Ac-GD3 18:1;O2/23:0	1	1	1	1	0	0
46	O-Ac-GD3 42:2;O2	78	264.27	O-Ac-GD3 18:1;O2/24:1	1	1	1	1	0	0
47	GD3 36:1;O2	79	264.27	GD3 18:1;O2/18:0	0.9715	0.9652	0.962882	0.966527	0.00445986	0.00461431
		80	236.3	GD3 16:1;O2/20:0	0.0324	0.0356	0.0324184	0.0334728	0.00184223	0.0550366
48	GD3 36:2;O2	81	262.27	GD3 18:2;O2/18:0	1	1	1	1	0	0
49	GD3 38:1;O2	82	264.27	GD3 18:1;O2/20:0	0.2356	0.2561	0.214182	0.235294	0.0209605	0.0890821
		83	292.3	GD3 20:1;O2/18:0	0.7486	0.7851	0.760418	0.764706	0.018624	0.0243545
50	GD3 40:1;O2	84	264.27	GD3 18:1;O2/22:0	1	1	1	1	0	0
51	GD3 41:1;O2	85	264.27	GD3 18:1;O2/23:0	1	1	1	1	0	0
52	GD3 42:2;O2	86	264.27	GD3 18:1;O2/24:1	1	1	1	1	0	0
53	GD3(NeuGc) 36:1;O2	87	264.27	GD3(NeuGc) 18:1;O2/18:0	1	1	1	1	0	0
54	O-Ac-GD2 36:1;O2	88	264.27	O-Ac-GD2 18:1;O2/18:0	1	1	1	1	0	0
55	O-Ac-GD2 38:1;O2	89	264.27	O-Ac-GD2 18:1;O2/20:0	0.2816	0.2651	0.286	0.277567	0.0110182	0.0396956
		90	292.3	O-Ac-GD2 20:1;O2/18:0	0.7316	0.7164	0.7193	0.722433	0.00806983	0.0111703
56	GD2 36:1;O2	91	264.27	GD2 18:1;O2/18:0	1	1	1	1	0	0
57	GD2 38:1;O2	92	292.3	GD2 20:1;O2/18:0	1	1	1	1	0	0
58	O-Ac-GD1a 36:1;O2	93	264.27	O-Ac-GD1a 18:1;O2/18:0	1	1	1	1	0	0
59	O-Ac-GD1a 38:1;O2	94	264.27	O-Ac-GD1a 18:1;O2/20:0	0.7536	0.7761	0.764418	0.764706	0.0112528	0.0147152
		95	292.3	O-Ac-GD1a 20:1;O2/18:0	0.2456	0.2456	0.214682	0.235294	0.0178503	0.0758638
60	O-Ac-GD1b 36:1;O2	96	264.27	O-Ac-GD1b 18:1;O2/18:0	1	1	1	1	0	0
61	O-Ac-GD1b 38:1;O2	97	264.27	O-Ac-GD1b 18:1;O2/20:0	0.2023	0.1982	0.205561	0.20202	0.00368827	0.0182569
		98	292.3	O-Ac-GD1b 20:1;O2/18:0	0.8063	0.7881	0.799539	0.79798	0.00919969	0.0115287
62	GD1a 34:1;O2	99	264.27	GD1a 18:1;O2/16:0	1	1	1	1	0	0
63	GD1a 36:1;O2	100	264.27	GD1a 18:1;O2/18:0	0.9823	0.9456	0.987763	0.971888	0.0229289	0.0235922
		101	292.3	GD1a 20:1;O2/16:0	0.0256	0.0291	0.0296373	0.0281124	0.00219237	0.0779858
64	GD1a 37:1;O2	102	264.3	GD1a 18:1;O2/19:0	0.7489	0.7861	0.708836	0.747945	0.038641	0.0516629
		103	292.3	GD1a 20:1;O2/17:0	0.0861	0.0796	0.0726562	0.0794521	0.00672314	0.0846188
		104	278.28	GD1a 19:1;O2/18:0	0.1823	0.1726	0.162908	0.172603	0.00969589	0.0561746
65	GD1a 38:1;O2	105	264.27	GD1a 18:1;O2/20:0	0.1559	0.16	0.180194	0.165365	0.0130054	0.0786464
		106	292.3	GD1a 20:1;O2/18:0	0.8256	0.8451	0.833206	0.834635	0.00982829	0.0117755
66	GD1a 38:2;O2	107	264.27	GD1a 18:1;O2/20:1	0.2601	0.2716	0.268278	0.266659	0.00591844	0.0221947
		108	292.3	GD1a 20:1;O2/18:1	0.7263	0.7261	0.747622	0.733341	0.0123683	0.0168657
67	GD1a 39:1;O2	109	264.27	GD1a 18:1;O2/21:1	0.4316	0.4136	0.428685	0.424628	0.00966146	0.0227527
		110	292.3	GD1a 20:1;O2/C19:1	0.5826	0.5463	0.597215	0.575372	0.0262157	0.0455631
68	GD1a 42:2;O2	111	264.27	GD1a 18:1;O2/24:1	0.3871	0.3675	0.377183	0.377261	0.00980023	0.0259773
		112	292.3	GD1a 20:1;O2/22:1	0.6356	0.6745	0.558117	0.622739	0.0592478	0.0951406
69	GD1b 36:1;O2	113	264.27	GD1b 18:1;O2/18:0	0.9756	0.9924	0.98591	0.984637	0.00847204	0.00860423
		114	292.3	GD1b 20:1;O2/16:0	0.0136	0.0165	0.00386135	0.0113204	0.00662051	0.584827
		115	236.3	GD1b 16:1;O2/20:0	0.0045	0.0039	0.00372905	0.00404302	0.000404883	0.100144
70	GD1b 37:1;O2	116	264.3	GD1b 18:1;O2/19:0	0.7985	0.7856	0.789318	0.791139	0.0066401	0.00839309
		117	278.28	GD1b 19:1;O2/18:0	0.15463	0.1363	0.145779	0.14557	0.00916679	0.0629719
		118	292.3	GD1b 20:1;O2/17:0	0.0623	0.0678	0.0597734	0.0632911	0.00410406	0.0648441
71	GD1b 38:1;O2	119	264.27	GD1b 18:1;O2/20:0	0.1301	0.1201	0.116787	0.122329	0.0069309	0.056658
		120	292.3	GD1b 20:1;O2/18:0	0.8706	0.8613	0.901113	0.877671	0.0208273	0.0237302
72	GD1b 38:2;O2	121	290.3	GD1b 20:2;O2/18:0	0.9561	0.9756	1.01534	0.982346	0.0301899	0.0307324
		122	292.3	GD1b 20:1;O2/18:1	0.0136	0.0164	0.0229617	0.0176539	0.00480515	0.272186
73	GD1b 42:2;O2	123	264.27	GD1b 18:1;O2/24:1	0.6546	0.6341	0.590845	0.626515	0.032547	0.0519493
		124	292.3	GD1b 20:1;O2/22:1	0.3671	0.3845	0.368855	0.373485	0.00957965	0.0256494
74	GD1c 36:1;O2	125	264.27	GD1c 18:1;O2/18:0	1	1	1	1	0	0
75	GD1c 38:1;O2	126	264.27	GD1c 18:1;O2/20:0	0.1501	0.1463	0.124332	0.140244	0.0139107	0.0991896
		127	292.3	GD1c 20:1;O2/18:0	0.8456	0.8651	0.868568	0.859756	0.0123816	0.0144013
76	GD1a(NeuGc) 36:1;O2	128	264.27	GD1a(NeuGc) 18:1;O2/18:0	1	1	1	1	0	0
77	GD1a(NeuGc) 38:1;O2	129	264.27	GD1a(NeuGc) 18:1;O2/20:0	0.1463	0.1396	0.147082	0.144327	0.0041126	0.0284949
		130	292.3	GD1a(NeuGc) 20:1;O2/18:0	0.8459	0.8446	0.876518	0.855673	0.0180643	0.0211113
78	GD1b(NeuGc))# 36:1;O2	131	264.27	GD1b(NeuGc) 18:1;O2/18:0	1	1	1	1	0	0
79	GD1b(NeuGc)# 38:1;O2	132	264.27	GD1b(NeuGc) 18:1;O2/20:0	0.1661	0.1469	0.159336	0.157445	0.00973864	0.0618541
		133	292.3	GD1b(NeuGc) 20:1;O2/18:0	0.8146	0.8423	0.870764	0.842555	0.0280828	0.0333306
80	GD1b(NeuGc) 36:1;O2	134	264.27	GD1c(NeuGc) 18:1;O2/18:0	1	1	1	1	0	0
81	GD1b(NeuGc) 38:1;O2	135	292.3	GD1c(NeuGc) 20:1;O2/18:0	1	1	1	1	0	0
82	GalNAc-GD1a 36:1;O2	136	264.27	GalNAc-GD1a 18:1;O2/18:0	0.9848	0.9942	0.974728	0.984576	0.00973818	0.00989074
		137	236.3	GalNAc-GD1a 16:1;O2/20:0	0.0152	0.016	0.0150725	0.0154242	0.000502747	0.0325948
83	Fuc-GD1b-O-Ac 36:1;O2	138	264.27	Fuc-GD1b-O-Ac 18:1;O2/18:0	1	1	1	1	0	0
84	Fuc-GD1b-O-Ac 38:1;O2	139	264.27	Fuc-GD1b-O-Ac 18:1;O2/20:0	0.6313	0.6212	0.626621	0.626374	0.00505454	0.00806952
		140	292.3	Fuc-GD1b-O-Ac 20:1;O2/18:0	0.3689	0.3762	0.375779	0.373626	0.00409857	0.0109697
85	Fuc-GD1b 36:1;O2	141	264.27	Fuc-GD1b 18:1;O2/18:0	1	1	1	1	0	0
86	Fuc-GD1b 36:2;O2	142	264.27	Fuc-GD1b 18:1;O2/18:1	1	1	1	1	0	0
87	Fuc-GD1b 38:1;O2	143	264.27	Fuc-GD1b 18:1;O2/20:0	0.141	0.136	0.155768	0.144256	0.0102786	0.0712522
		144	292.3	Fuc-GD1b 20:1;O2/18:0	0.846	0.896	0.825232	0.855744	0.0363765	0.0425086
88	Fuc-GD1b 38:2;O2	145	264.27	Fuc-GD1b 18:1;O2/20:1	0.201	0.21	0.193534	0.201511	0.0082449	0.0409153
		146	292.3	Fuc-GD1b 20:1;O2/18:1	0.792	0.7656	0.837866	0.798489	0.0365673	0.0457957
89	O-Ac-GT3 36:1;O2	147	264.27	O-Ac-GT3 18:1;O2/18:0	1	1	1	1	0	0
90	O-Ac-GT3 38:1;O2	148	264.27	O-Ac-GT3 18:1;O2/20:0	0.3463	0.3456	0.302386	0.331429	0.0251543	0.0758966
		149	292.3	O-Ac-GT3 20:1;O2/18:0	0.6512	0.6789	0.675614	0.668571	0.0151335	0.0226356
91	GT3 36:1;O2	150	264.27	GT3 18:1;O2/18:0	1	1	1	1	0	0
92	GT3 38:1;O2	151	264.27	GT3 18:1;O2/20:0	0.2721	0.2871	0.230274	0.263158	0.0294496	0.111908
		152	292.3	GT3 20:1;O2/18:0	0.7216	0.7456	0.743326	0.736842	0.0132489	0.0179807
93	O-Ac-GT1a 36:1;O2	153	264.27	O-Ac-GT1a 18:1;O2/18:0	1	1	1	1	0	0
94	O-Ac-GT1a 38:1;O2	154	264.27	O-Ac-GT1a 18:1;O2/20:0	0.1489	0.1532	0.147866	0.149989	0.00282879	0.01886
		155	292.3	O-Ac-GT1a 20:1;O2/18:0	0.8413	0.8614	0.847334	0.850011	0.010314	0.0121339
95	O-Ac-GT1b 36:1;O2	156	264.27	O-Ac-GT1b 18:1;O2/18:0	0.9514	0.9681	0.98415	0.967883	0.0163759	0.0169193
		157	236.3	O-Ac-GT1b 16:1;O2/20:0	0.0345	0.0342	0.0276504	0.0321168	0.00387094	0.120527
96	O-Ac-GT1b 38:1;O2	158	264.27	O-Ac-GT1b 18:1;O2/20:0	0.1861	0.1931	0.154417	0.177872	0.0206122	0.115882
		159	292.3	O-Ac-GT1b 20:1;O2/18:0	0.8431	0.8316	0.791683	0.822128	0.0269856	0.0328241
97	GT1a 36:1;O2	160	264.27	GT1a 18:1;O2/18:0	1	1	1	1	0	0
98	GT1a 38:1;O2	161	292.3	GT1a 20:1;O2/18:0	1	1	1	1	0	0
99	GT1b 36:1;O2	162	264.27	GT1b 18:1;O2/18:0	0.992	0.991	0.999062	0.994021	0.00439459	0.00442103
		163	236.3	GT1b 16:1;O2/20:0	0.0062	0.0065	0.00523777	0.00597926	0.000659435	0.110287
100	GT1b 37:1;O2	164	264.27	GT1b 18:1;O2/19:0	0.5963	0.5723	0.599516	0.589372	0.014872	0.0252336
		165	278.3	GT1b 17:1;O2/20:0	0.4023	0.4016	0.427984	0.410628	0.0150348	0.0366143
101	GT1b 38:1;O2	166	264.27	GT1b 18:1;O2/20:0	0.121	0.1263	0.126537	0.124612	0.0031307	0.0251235
		167	292.3	GT1b 20:1;O2/18:0	0.8721	0.8812	0.872863	0.875388	0.00504813	0.00576674
102	GT1b 38:2;O2	168	264.27	GT1b 18:1;O2/20:1	0.1301	0.1456	0.124647	0.133449	0.0108707	0.0814597
		169	292.3	GT1b 20:1;O2/18:1	0.8689	0.8751	0.855653	0.866551	0.00993381	0.0114636
103	GT1b 39:1;O2	170	264.27	GT1b 18:1;O2/21:0	0.7099	0.7262	0.692932	0.709677	0.016635	0.0234402
		171	292.3	GT1b 20:1;O2/19:0	0.3012	0.3051	0.264668	0.290323	0.0223032	0.076822
104	GT1b 40:1;O2	172	264.27	GT1b 18:1;O2/22:1	0.4851	0.4841	0.462098	0.477099	0.0130013	0.0272508
		173	292.3	GT1b 20:1;O2/20:1	0.5123	0.5362	0.520202	0.522901	0.0121764	0.0232862
105	GT1b(NeuGc) 36:1;O2	174	264.27	GT1b(NeuGc)18:1;O2/18:0	1	1	1	1	0	0
106	GT1b(NeuGc) 38:1;O2	175	264.27	GT1b(NeuGc) 18:1;O2/20:0	0.2365	0.2456	0.232917	0.238339	0.0065384	0.0274332
		176	292.3	GT1b(NeuGc) 20:1;O2/18:0	0.7751	0.7716	0.738283	0.761661	0.0203215	0.0266805
107	Di-O-Ac-GQ1b 36:1;O2	177	264.27	Di-O-Ac-GQ1b 18:1;O2/18:0	1	1	1	1	0	0
108	Di-O-Ac-GQ1b 38:1;O2	178	264.27	Di-O-Ac-GQ1b 18:1;O2/20:0	0.3356	0.3546	0.348262	0.346154	0.00967377	0.0279464
		179	292.3	Di-O-Ac-GQ1b 20:1;O2/18:0	0.6645	0.6612	0.635838	0.653846	0.0156822	0.0239845
109	O-Ac-GQ1b 36:1;O2	180	264.27	O-Ac-GQ1b 18:1;O2/18:0	1	1	1	1	0	0
110	O-Ac-GQ1b 38:1;O2	181	264.27	O-Ac-GQ1b 18:1;O2/18:0	1	1	1	1	0	0
111	GQ1b 36:1;O2	182	264.27	GQ1b 18:1;O2/18:0	1	1	1	1	0	0
112	GQ1b 38:1;O2	183	264.27	GQ1b 18:1;O2/20:0	0.1645	0.1623	0.169752	0.165517	0.00382859	0.0231311
		184	292.3	GQ1b 20:1;O2/18:0	0.8126	0.8421	0.848748	0.834483	0.0192404	0.0230566
